# Supplementary material for: Efficient, high yield perovskite/fullerene planar-heterojunction solar cells via one-step spin-coating processing
Source: Royal Society of Chemistry journal article supplement (doi:10.1039/c6ra07068j), 2016-01-01
Supplement: c6ra07068j1.pdf [file c6ra07068j1.pdf]

## Supporting Information

### Efficient perovskite/Fullerene Planar-Heterojunction Solar cells via one-step spin-coating processed

**Ligang Xu,<sup>a,b</sup> Yunjie Dai,<sup>a,b</sup> Hongmei Zhang<sup>a,b\*</sup> and Wei Huang<sup>a,b\*</sup>**

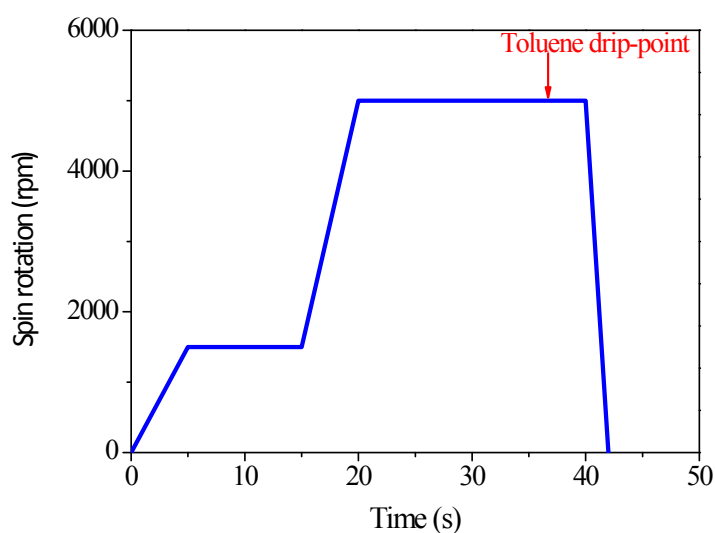

Figure S1. The detailed speed-time profile for spin coating process with the toluene drop-casting.

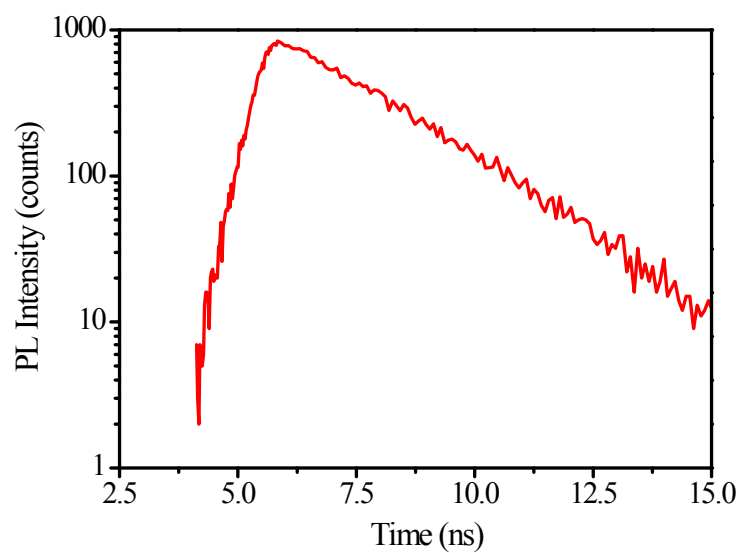

Figure S2. Time-resolved photoluminescent (PL) decay curves of a high performance perovskite device
